# Supplementary material
Source: PubMed Central journal article supplement (PMC3929406)
Supplement: supp_141.5.1059_DEV099994.pdf [file supp_141.5.1059_DEV099994.pdf]

**Figure S1**

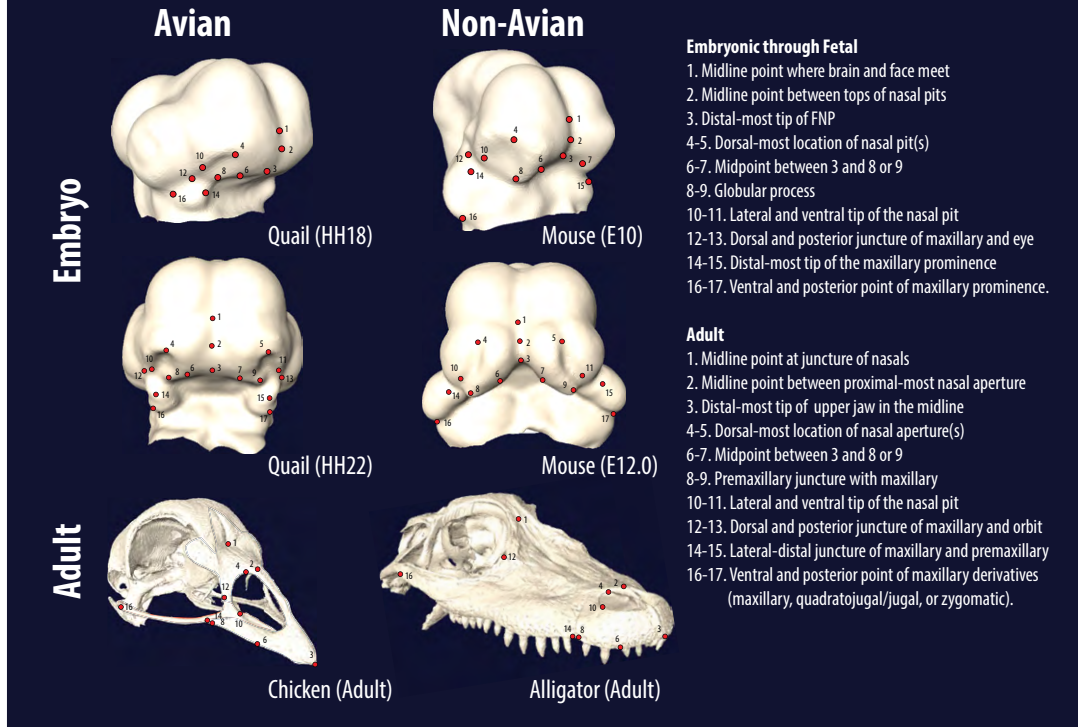

**Figure S1: Morphometric Landmarks.** Representative embryos and adults are shown with the location of landmarks and their descriptions. Surface landmarks and skeletal landmarks are considered to be homologous locations for the purpose of morphometric analysis. To choose these landmarks we tracked surface features of the facial prominences from prominence outgrowth to fusion and later fetal growth. Skeletal derivatives in adults were matched to surface fetal structures using generalized descriptions and published fate mapping (e.g., assuming that the distal tip of the embryonic frontonasal process corresponds to the distal tip of the adult upper jaw).

# FIGURE S2

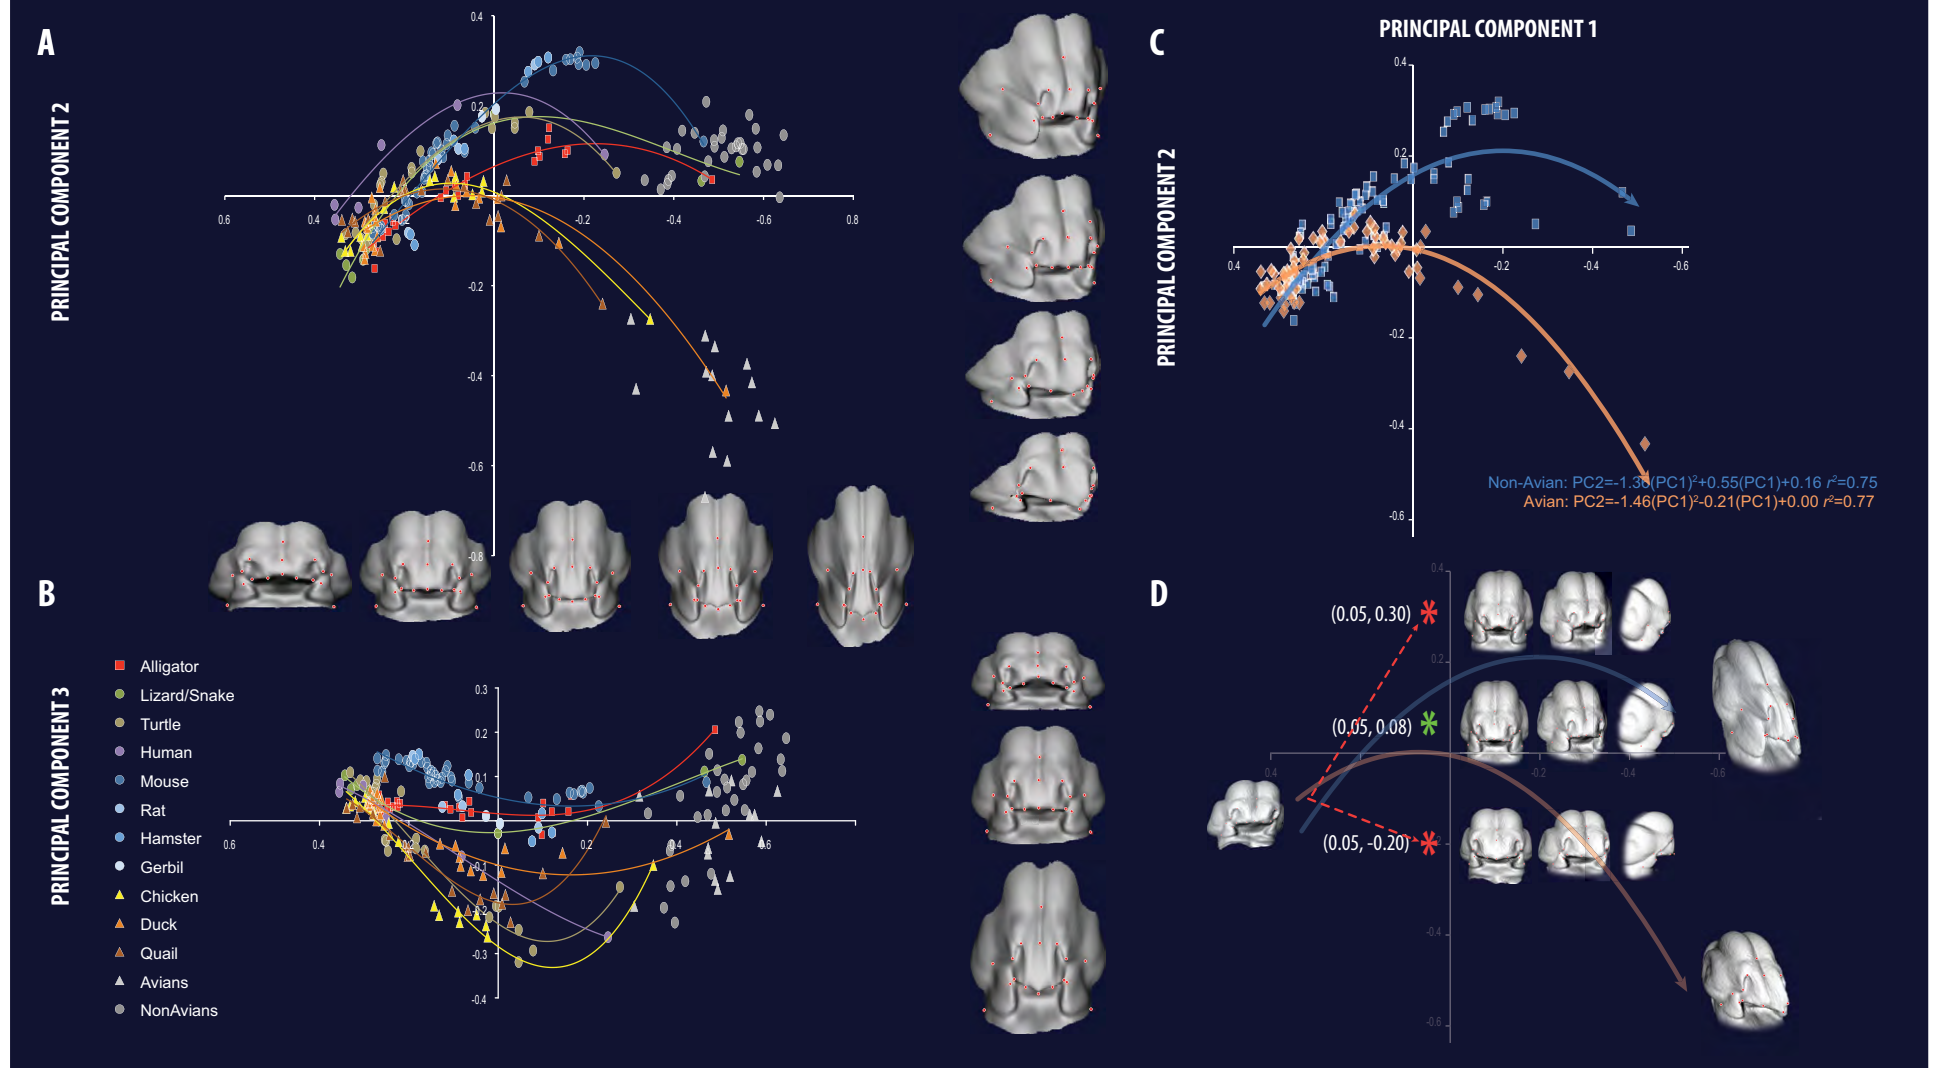

**Figure S2. PCA axes in two-dimensional scatterplots.** A. PC1 versus PC2. B. PC1 versus PC3. C. Estimated average non-avian (blue squares) and avian (red diamonds) PC1-2 developmental trajectories (lines). D. Estimated landmark configurations and embryo morphologies of trajectories above, within, and below amniote averages at common PC1 (developmental age/facial length).

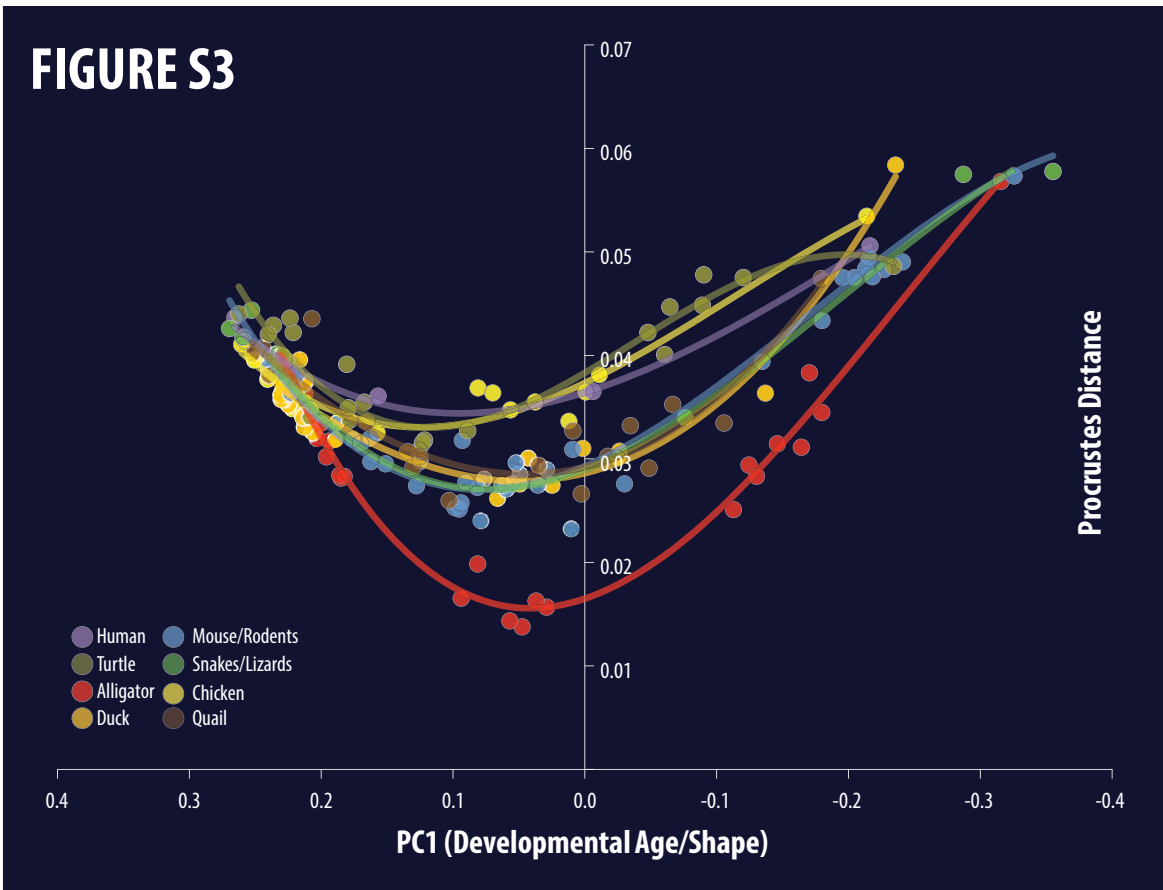

**Figure S3. Average Procrustes distance for each species.** Data from Figure 1B plotted for individual species. All species are most convergent with the average facial shape at or near the time of facial primordial fusion, after which shape diversity steadily increases.

**FIGURE S4**

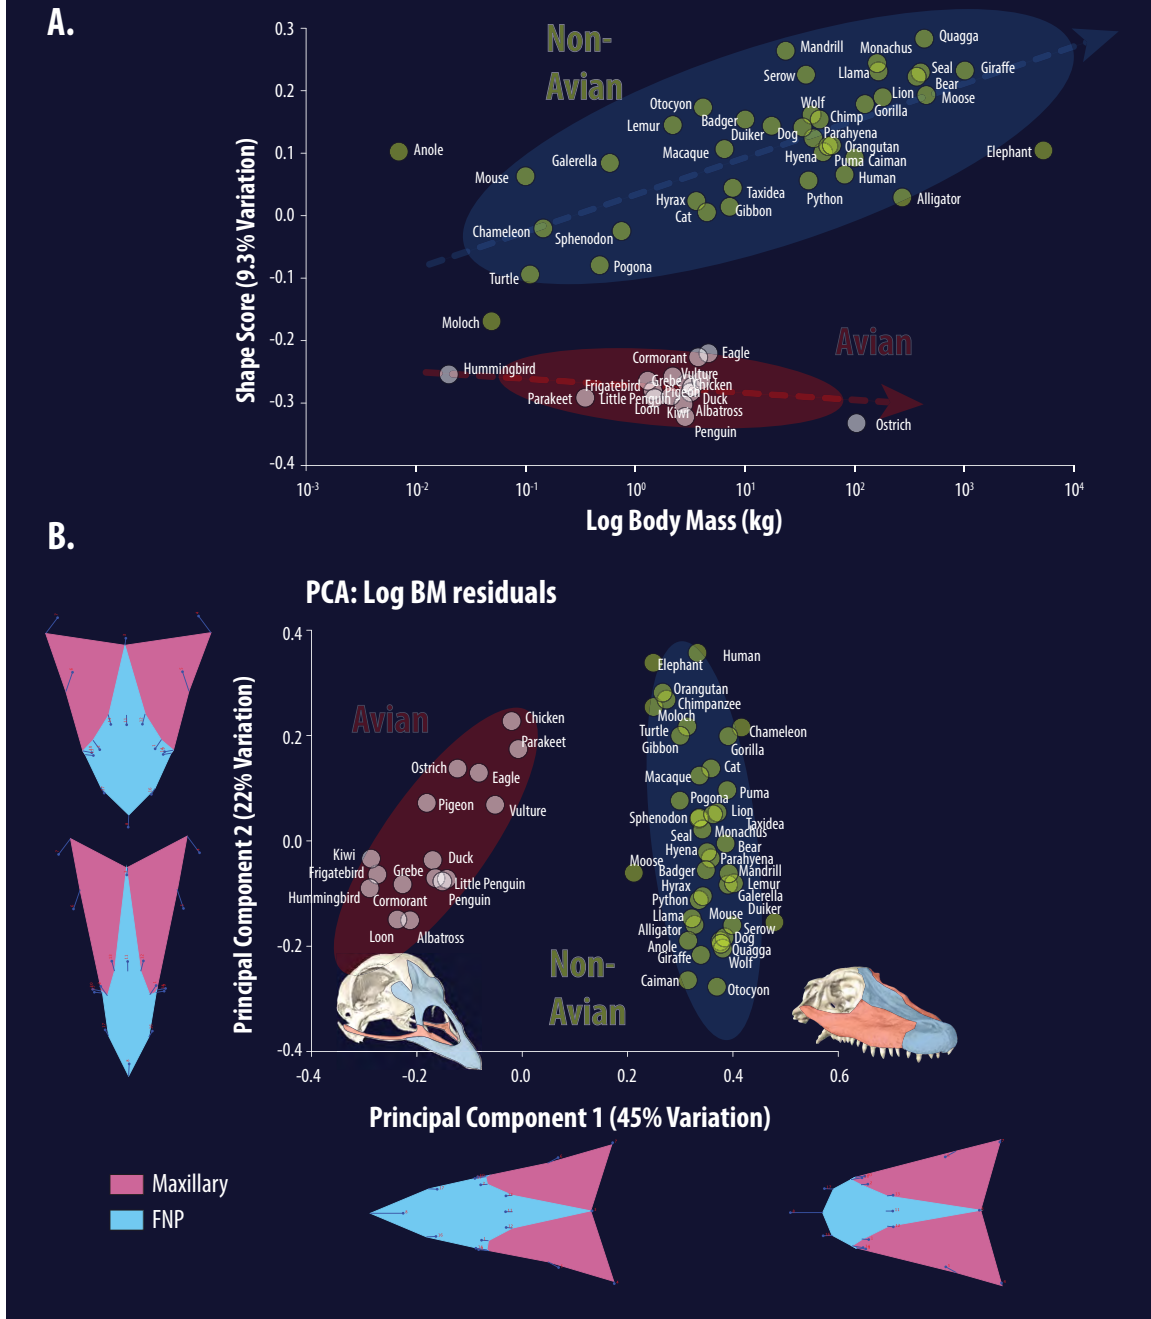

**Figure S4. Allometry and shape comparison in adult amniote skulls. A.** Multivariate regression of log body mass (kg) on shape reveals divergence in shape-size relationship between non-avian and avian amniote adults. **B.** PCA of body-mass/shape residuals from (A) demonstrates that the relative proportions of the maxillary and FNP-derivatives (PC1) separate avians and non-avians even when accounting for allometry, while in both groups longer skulls tend to be narrower (PC2). Mean landmark configurations are shown in dorsal view with vectors showing direction and magnitude of eigenvectors. Faces color-coded according to developmental derivatives (maxillary=red, FNP=blue).

## Figure S5

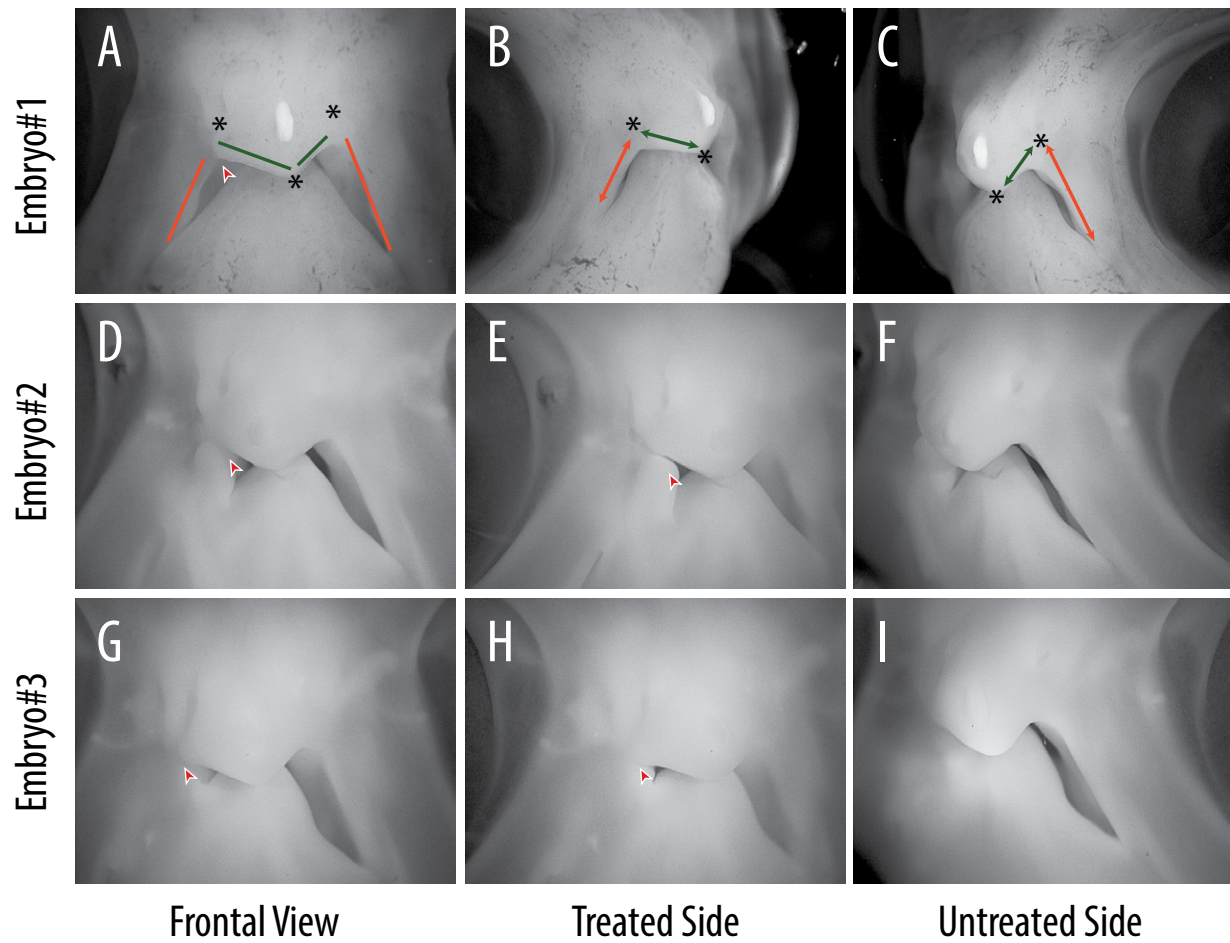

**Figure S5. Additional experimental outcomes.** We performed a dual experimental treatment in which both a SHH-N bead was placed in the FNP and *Ptc-Δ*-loop was electroporated into the maxillary at HH15-16. All embryos (N=3) exhibited reduced maxillaries and expanded FNPs (compare arrows on treated versus untreated sides), as well as clefts of the primary palate (red arrows) compared to untreated sides.

**Table S1: Embryonic sample age composition (Hrs=hours incubation, CS=Carnegie stage, TS=tail somites, Th=Theiler stage).**

| Common      | Order      | Species                           | Unit | Age  | N  |
|-------------|------------|-----------------------------------|------|------|----|
| Alligator   | Crocodylia | <i>Alligator mississippiensis</i> | Hrs  | 216  | 1  |
| Alligator   | Crocodylia | <i>Alligator mississippiensis</i> | Hrs  | 240  | 2  |
| Alligator   | Crocodylia | <i>Alligator mississippiensis</i> | Hrs  | 264  | 2  |
| Alligator   | Crocodylia | <i>Alligator mississippiensis</i> | Hrs  | 288  | 3  |
| Alligator   | Crocodylia | <i>Alligator mississippiensis</i> | Hrs  | 312  | 3  |
| Alligator   | Crocodylia | <i>Alligator mississippiensis</i> | Hrs  | 360  | 3  |
| Alligator   | Crocodylia | <i>Alligator mississippiensis</i> | Hrs  | 384  | 3  |
| Alligator   | Crocodylia | <i>Alligator mississippiensis</i> | Hrs  | 456  | 3  |
| Alligator   | Crocodylia | <i>Alligator mississippiensis</i> | Hrs  | 480  | 2  |
| Alligator   | Crocodylia | <i>Alligator mississippiensis</i> | Hrs  | 528  | 2  |
| Ball python | Reptilia   | <i>Elaphe guttata</i>             | Hrs  | 192  | 1  |
| Chameleon   | Reptilia   | <i>Chameleo chameleon</i>         | Hrs  | 168  | 6  |
| Turtle      | Testudines | <i>Trachemys scripta</i>          | Hrs  | 168  | 5  |
| Turtle      | Testudines | <i>Trachemys scripta</i>          | Hrs  | 192  | 3  |
| Turtle      | Testudines | <i>Trachemys scripta</i>          | Hrs  | 264  | 4  |
| Turtle      | Testudines | <i>Trachemys scripta</i>          | Hrs  | 288  | 3  |
| Turtle      | Testudines | <i>Trachemys scripta</i>          | Hrs  | 360  | 3  |
| Turtle      | Testudines | <i>Trachemys scripta</i>          | Hrs  | 384  | 3  |
| Human       | Mammalia   | <i>Homo sapiens</i>               | CS   | 14   | 1  |
| Human       | Mammalia   | <i>Homo sapiens</i>               | CS   | 15   | 1  |
| Human       | Mammalia   | <i>Homo sapiens</i>               | CS   | 16   | 1  |
| Human       | Mammalia   | <i>Homo sapiens</i>               | CS   | 17   | 1  |
| Human       | Mammalia   | <i>Homo sapiens</i>               | CS   | 18   | 1  |
| Mouse       | Mammalia   | <i>Mus musculus</i> (C57bl)       | TS   | 1    | 1  |
| Mouse       | Mammalia   | <i>Mus musculus</i> (C57bl)       | TS   | 2    | 3  |
| Mouse       | Mammalia   | <i>Mus musculus</i> (C57bl)       | TS   | 3    | 1  |
| Mouse       | Mammalia   | <i>Mus musculus</i> (C57bl)       | TS   | 7    | 1  |
| Mouse       | Mammalia   | <i>Mus musculus</i> (C57bl)       | TS   | 8    | 1  |
| Mouse       | Mammalia   | <i>Mus musculus</i> (C57bl)       | TS   | 10   | 2  |
| Mouse       | Mammalia   | <i>Mus musculus</i> (C57bl)       | TS   | 11   | 2  |
| Mouse       | Mammalia   | <i>Mus musculus</i> (C57bl)       | TS   | 12   | 1  |
| Mouse       | Mammalia   | <i>Mus musculus</i> (C57bl)       | TS   | 13   | 2  |
| Mouse       | Mammalia   | <i>Mus musculus</i> (C57bl)       | TS   | 15   | 2  |
| Mouse       | Mammalia   | <i>Mus musculus</i> (C57bl)       | TS   | 16   | 2  |
| Mouse       | Mammalia   | <i>Mus musculus</i> (C57bl)       | Th   | 11.5 | 15 |
| Mouse       | Mammalia   | <i>Mus musculus</i> (C57bl)       | Th   | 12.5 | 8  |
| Rat         | Mammalia   | <i>Rattus norvegicus</i>          | Th   | 12   | 1  |
| Rat         | Mammalia   | <i>Rattus norvegicus</i>          | Th   | 13   | 2  |
| Rat         | Mammalia   | <i>Rattus norvegicus</i>          | Th   | 14   | 1  |
| Hamster     | Mammalia   | <i>Mesocricetus auratus</i>       | Th   | 9    | 2  |
| Hamster     | Mammalia   | <i>Mesocricetus auratus</i>       | Th   | 10   | 2  |
| Hamster     | Mammalia   | <i>Mesocricetus auratus</i>       | Th   | 11   | 3  |
| Gerbil      | Mammalia   | <i>Meriones unguiculatus</i>      | Th   | 16   | 2  |

|         |      |                           |     |     |   |
|---------|------|---------------------------|-----|-----|---|
| Chicken | Aves | <i>Gallus gallus</i>      | Hrs | 84  | 3 |
| Chicken | Aves | <i>Gallus gallus</i>      | Hrs | 96  | 4 |
| Chicken | Aves | <i>Gallus gallus</i>      | Hrs | 108 | 1 |
| Chicken | Aves | <i>Gallus gallus</i>      | Hrs | 120 | 2 |
| Chicken | Aves | <i>Gallus gallus</i>      | Hrs | 132 | 2 |
| Chicken | Aves | <i>Gallus gallus</i>      | Hrs | 144 | 2 |
| Chicken | Aves | <i>Gallus gallus</i>      | Hrs | 156 | 6 |
| Duck    | Aves | <i>Anas platyrhynchos</i> | Hrs | 102 | 3 |
| Duck    | Aves | <i>Anas platyrhynchos</i> | Hrs | 120 | 8 |
| Duck    | Aves | <i>Anas platyrhynchos</i> | Hrs | 138 | 2 |
| Duck    | Aves | <i>Anas platyrhynchos</i> | Hrs | 144 | 1 |
| Duck    | Aves | <i>Anas platyrhynchos</i> | Hrs | 150 | 1 |
| Duck    | Aves | <i>Anas platyrhynchos</i> | Hrs | 162 | 2 |
| Duck    | Aves | <i>Anas platyrhynchos</i> | Hrs | 168 | 1 |
| Duck    | Aves | <i>Anas platyrhynchos</i> | Hrs | 174 | 1 |
| Duck    | Aves | <i>Anas platyrhynchos</i> | Hrs | 180 | 3 |
| Duck    | Aves | <i>Anas platyrhynchos</i> | Hrs | 186 | 1 |
| Duck    | Aves | <i>Anas platyrhynchos</i> | Hrs | 204 | 1 |
| Quail   | Aves | <i>Coturnix coturnix</i>  | Hrs | 72  | 1 |
| Quail   | Aves | <i>Coturnix coturnix</i>  | Hrs | 84  | 2 |
| Quail   | Aves | <i>Coturnix coturnix</i>  | Hrs | 96  | 4 |
| Quail   | Aves | <i>Coturnix coturnix</i>  | Hrs | 114 | 3 |
| Quail   | Aves | <i>Coturnix coturnix</i>  | Hrs | 120 | 3 |
| Quail   | Aves | <i>Coturnix coturnix</i>  | Hrs | 126 | 1 |
| Quail   | Aves | <i>Coturnix coturnix</i>  | Hrs | 144 | 5 |
| Quail   | Aves | <i>Coturnix coturnix</i>  | Hrs | 168 | 1 |
| Quail   | Aves | <i>Coturnix coturnix</i>  | Hrs | 216 | 1 |

**Table S2: Adult Sample and Body Masses** (NSF Digital Morphology Library at the University of Texas, Austin [NSF], [www.digimorph.org](http://www.digimorph.org), Ohio University Visible Interactive Alligator [VIA], [www.oucom.ohiou.edu/dbms-witmer/3D\\_gator.htm](http://www.oucom.ohiou.edu/dbms-witmer/3D_gator.htm), Kyoto University Primate Research Institute Digital Morphology Museum, [KU], [www2.pri.kyoto-u.ac.jp/dmm/WebGallery/index.html](http://www2.pri.kyoto-u.ac.jp/dmm/WebGallery/index.html)).

| Species (common name)                         | Group     | 3D Source | BM (kg) | log BM |
|-----------------------------------------------|-----------|-----------|---------|--------|
| <i>Anas platyrhynchos</i> (white pekin duck)  | Avian     | NSF       | 3.2     | 0.51   |
| <i>Apteryx australis</i> (kiwi)               | Avian     | NSF       | 3.3     | 0.52   |
| <i>Brotoogeris chrysopterus</i> (parakeet)    | Avian     | NSF       | 0.35    | -0.46  |
| <i>Columba livia</i> (pigeon)                 | Avian     | Paper     | 2.1     | 0.32   |
| <i>Coragyps atratus</i> (black vulture)       | Avian     | NSF       | 2.2     | 0.34   |
| <i>Diomedea immutabilis</i> (albatross)       | Avian     | NSF       | 2.75    | 0.44   |
| <i>Eudyptula minor</i> (little penguin)       | Avian     | NSF       | 1.5     | 0.18   |
| <i>Fregata magnificens</i> (frigatebird)      | Avian     | NSF       | 1.45    | 0.16   |
| <i>Gallus gallus</i> (chicken)                | Avian     | NSF       | 2.94    | 0.47   |
| <i>Gavia immer</i> (common loon)              | Avian     | NSF       | 4       | 0.60   |
| <i>Haliaeetus leucocephalus</i> (bald eagle)  | Avian     | NSF       | 4.65    | 0.67   |
| <i>Patagona gigas</i> (hummingbird)           | Avian     | NSF       | 0.02    | -1.70  |
| <i>Phalacrocorax</i> sp. (cormorant)          | Avian     | NSF       | 3.75    | 0.57   |
| <i>Podilymbus podiceps</i> (grebe)            | Avian     | NSF       | 1.3     | 0.11   |
| <i>Spheniscus demersus</i> (penguin)          | Avian     | NSF       | 2.85    | 0.45   |
| <i>Struthio camelus</i> (ostrich)             | Avian     | NSF       | 104     | 2.02   |
| <i>Alces alces</i> (moose)                    | Non-avian | NSF       | 450     | 2.65   |
| <i>Alligator mississippiensis</i> (alligator) | Non-avian | VIA       | 271.5   | 2.43   |
| <i>Anolis carolinensis</i> (green anole)      | Non-avian | NSF       | 0.007   | -2.15  |
| <i>Caiman</i> sp. (caiman)                    | Non-avian | KU        | 100     | 2.00   |
| <i>Canis familiaris</i> (dog)                 | Non-avian | KU        | 33.5    | 1.53   |
| <i>Canis lupus</i> (wolf)                     | Non-avian | KU        | 40.5    | 1.61   |
| <i>Capricornis crispus</i> (serow)            | Non-avian | NSF       | 36      | 1.56   |
| <i>Cephalopus</i> sp. (duiker)                | Non-avian | NSF       | 17.5    | 1.24   |
| <i>Chameleo chameleon</i> (chameleon)         | Non-avian | NSF       | 0.145   | -0.84  |
| <i>Elephas maximus</i> (Asian elephant)       | Non-avian | NSF       | 5250    | 3.72   |
| <i>Equus quagga</i> (quagga)                  | Non-avian | KU        | 430.5   | 2.63   |
| <i>Felis concolor</i> (puma)                  | Non-avian | KU        | 62      | 1.79   |
| <i>Felis leo</i> (lion)                       | Non-avian | NSF       | 180.5   | 2.26   |
| <i>Galerella sanguinea</i> (slender mongoose) | Non-avian | NSF       | 0.5875  | -0.23  |
| <i>Giraffa camelopardalis</i> (giraffe)       | Non-avian | NSF       | 1010    | 3.00   |
| <i>Glyptemys muhlenbergii</i> (turtle)        | Non-avian | NSF       | 0.11    | -0.96  |
| <i>Gorilla gorilla</i> (gorilla)              | Non-avian | KU        | 124     | 2.09   |



|                                               |           |     |       |       |
|-----------------------------------------------|-----------|-----|-------|-------|
| <i>Homo sapiens</i> (human)                   | Non-avian | KU  | 81    | 1.91  |
| <i>Hyaena hyaena</i> (hyaena)                 | Non-avian | NSF | 51.5  | 1.71  |
| <i>Hydrurga leptonyx</i> (leopard seal)       | Non-avian | NSF | 400   | 2.60  |
| <i>Hylobates lar</i> (gibbon)                 | Non-avian | KU  | 7.25  | 0.86  |
| <i>Lama glama</i> (llama)                     | Non-avian | NSF | 165   | 2.22  |
| <i>Lemur catta</i> (lemur)                    | Non-avian | KU  | 2.2   | 0.34  |
| <i>Macaca mulatta</i> (macaque)               | Non-avian | KU  | 6.5   | 0.81  |
| <i>Mandrillus sphinx</i> (mandrill)           | Non-avian | KU  | 23.5  | 1.37  |
| <i>Mayailurus iriomotensis</i> (iriomote cat) | Non-avian | KU  | 4.5   | 0.65  |
| <i>Meles meles</i> (badger)                   | Non-avian | KU  | 10.05 | 1.00  |
| <i>Moloch horridus</i> (thorny devil)         | Non-avian | NSF | 0.049 | -1.31 |
| <i>Monachus tropicalis</i> (monk seal)        | Non-avian | NSF | 160   | 2.20  |
| <i>Mus musculus</i> (mouse)                   | Non-avian | NSF | 0.1   | -1.00 |
| <i>Otocyon megalotis</i> (bat-eared fox)      | Non-avian | NSF | 4.15  | 0.62  |
| <i>Pan troglodytes</i> (chimpanzee)           | Non-avian | KU  | 48    | 1.68  |
| <i>Parahyaena brunnea</i> (brown hyena)       | Non-avian | NSF | 42    | 1.62  |
| <i>Pogona vitticeps</i> (bearded dragon)      | Non-avian | NSF | 0.475 | -0.32 |
| <i>Pongo pygmaeus</i> (orangutan)             | Non-avian | KU  | 57.5  | 1.76  |
| <i>Procavia capensis</i> (hyrax)              | Non-avian | NSF | 3.6   | 0.56  |
| <i>Python molurus</i> (python)                | Non-avian | NSF | 38    | 1.58  |
| <i>Sphenodon punctatus</i> (tuatara)          | Non-avian | NSF | 0.75  | -0.12 |
| <i>Taxidea taxus</i> (badger)                 | Non-avian | NSF | 7.75  | 0.89  |
| <i>Ursus horribilis</i> (grizzly bear)        | Non-avian | NSF | 367.5 | 2.57  |

**Table S3: Distance matrices between species means (Procrustes above diagonal, Mahalanobis ( $D^2$ ) below)**

| D2/Pr     | Al    | Ch    | Du    | Ge    | Ha    | Hu    | Sq    | Mo    | Qu    | Ra   | Tu    |
|-----------|-------|-------|-------|-------|-------|-------|-------|-------|-------|------|-------|
| Alligator | 0.00  | 0.17  | 0.14  | 0.23  | 0.20  | 0.14  | 0.18  | 0.16  | 0.20  | 0.20 | 0.00  |
| Chicken   | 15.97 | 0.00  | 0.10  | 0.27  | 0.22  | 0.13  | 0.19  | 0.12  | 0.24  | 0.19 | 15.97 |
| Duck      | 14.21 | 8.79  | 0.00  | 0.22  | 0.21  | 0.12  | 0.16  | 0.07  | 0.18  | 0.17 | 14.21 |
| Gerbil    | 17.23 | 22.00 | 17.62 | 0.00  | 0.19  | 0.25  | 0.14  | 0.25  | 0.14  | 0.26 | 17.23 |
| Hamster   | 13.31 | 16.70 | 15.69 | 16.21 | 0.00  | 0.23  | 0.19  | 0.21  | 0.22  | 0.28 | 13.31 |
| Human     | 13.66 | 10.29 | 9.89  | 20.93 | 16.22 | 0.00  | 0.19  | 0.14  | 0.20  | 0.15 | 13.66 |
| Squamate  | 16.56 | 20.68 | 16.51 | 9.01  | 16.29 | 21.24 | 0.00  | 0.20  | 0.13  | 0.22 | 16.56 |
| Mouse     | 14.59 | 9.45  | 6.80  | 21.19 | 17.20 | 9.77  | 20.66 | 0.00  | 0.21  | 0.16 | 14.59 |
| Quail     | 15.16 | 20.95 | 16.38 | 8.98  | 15.49 | 19.36 | 10.63 | 18.98 | 0.00  | 0.24 | 15.16 |
| Rat       | 16.58 | 15.49 | 12.64 | 21.12 | 20.60 | 13.62 | 19.64 | 11.98 | 20.25 | 0.00 | 16.58 |
| Turtle    | 0.00  | 0.17  | 0.14  | 0.23  | 0.20  | 0.14  | 0.18  | 0.16  | 0.20  | 0.20 | 0.00  |

**Table S4: Significance levels of distances between species means (Procrustes distances above diagonal, Mahalanobis distances ( $D^2$ ) calculated from the Canonical Variates Analysis below)**

| D2/Pr     | Al     | Ch     | Du     | Ge    | Ha    | Hu     | Sq     | Mo    | Qu    | Ra     | Tu     |
|-----------|--------|--------|--------|-------|-------|--------|--------|-------|-------|--------|--------|
| Alligator | -      | 0.001  | 0.000  | 0.008 | 0.006 | 0.002  | 0.000  | 0.001 | 0.162 | 0.001  | -      |
| Chicken   | 0.001  | -      | <.0001 | 0.003 | 0.001 | 0.001  | 0.001  | 0.000 | 0.128 | 0.000  | 0.001  |
| Duck      | 0.000  | <.0001 | -      | 0.000 | 0.000 | <.0001 | <.0001 | 0.059 | 0.021 | <.0001 | 0.000  |
| Gerbil    | 0.009  | 0.001  | 0.000  | -     | 0.065 | 0.001  | 0.042  | 0.002 | 1.000 | 0.002  | 0.009  |
| Hamster   | 0.007  | 0.001  | 0.000  | 0.008 | -     | 0.002  | 0.002  | 0.001 | 0.326 | 0.001  | 0.007  |
| Human     | 0.002  | 0.001  | <.0001 | 0.003 | 0.003 | -      | <.0001 | 0.002 | 0.045 | 0.000  | 0.002  |
| Squamate  | 0.001  | 0.000  | <.0001 | 0.003 | 0.002 | 0.000  | -      | 0.000 | 0.087 | <.0001 | 0.001  |
| Mouse     | 0.001  | 0.000  | <.0001 | 0.003 | 0.001 | 0.001  | 0.000  | -     | 0.243 | 0.243  | 0.001  |
| Quail     | 0.143  | 0.094  | 0.053  | 0.200 | 0.125 | 0.095  | 0.128  | 0.119 | -     | 0.081  | 0.143  |
| Rat       | <.0001 | 0.000  | <.0001 | 0.000 | 0.001 | <.0001 | <.0001 | 0.000 | 0.049 | -      | <.0001 |
| Turtle    | -      | 0.001  | 0.000  | 0.008 | 0.006 | 0.002  | 0.000  | 0.001 | 0.162 | 0.001  | -      |
